# Supplementary material
Source: PubMed Central journal article supplement (PMC4728027)
Supplement: NIHMS741507-supplement.pdf [file NIHMS741507-supplement.pdf]

## **SUPPLEMENTAL FIGURE LEGENDS:**

**Supplemental Figure S1:** Idealized ZnO-NP geometries

**Supplemental Figure S2:** (A) Amplitude plot from AFM of ZnO-NP plates with three cross-sections (labeled 1, 2, and 3). (B) For each cross section height profiles are shown.

**Supplemental Figure S3:** Reduction in CFUs/ml after brief exposure to aqueous suspensions of ZnO-NPs synthesized as plates, pyramids, and spheres.

**Supplemental Figure S4:** Fraction of cells that partition to the (A) hexadecane interface, (B) chloroform minus the hexadecane interface, and (C) diethyl ether minus the hexane interface at mid-log versus stationary phase for each organism.

**Supplemental Figure S5:** UV-vis spectra and  $A_{350}$  (inset) for LBL coatings as a function of layer number.

**Supplemental Figure S6:** SEM micrographs of (A) bare polystyrene pegs, pegs coated in ZnO (B) plates, (C) pyramids, and (D) spheres.

**Supplemental Figure S7:** Amplitude (A) and 3D contour plots (B) from AFM of glass substrates coated with ZnO spheres, pyramids, and plates via LBL.

# Sphere

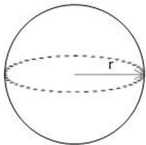

# Plate

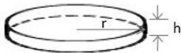

# Pyramid

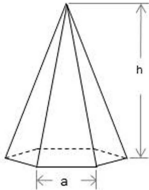

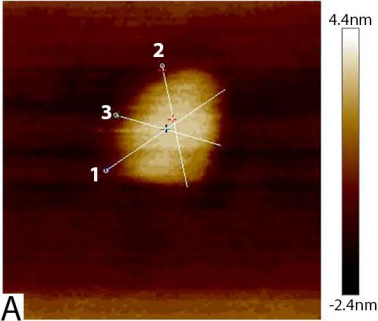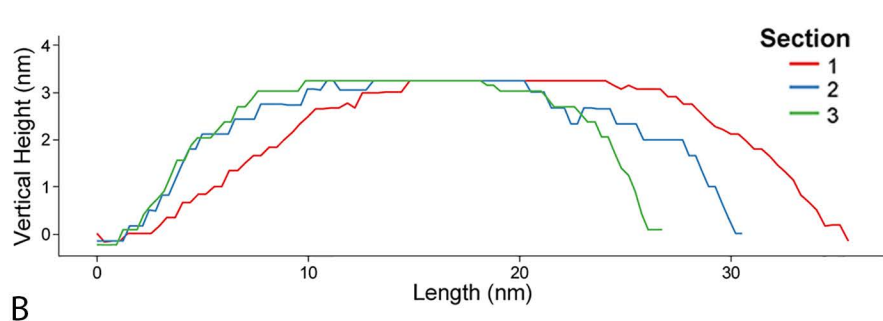

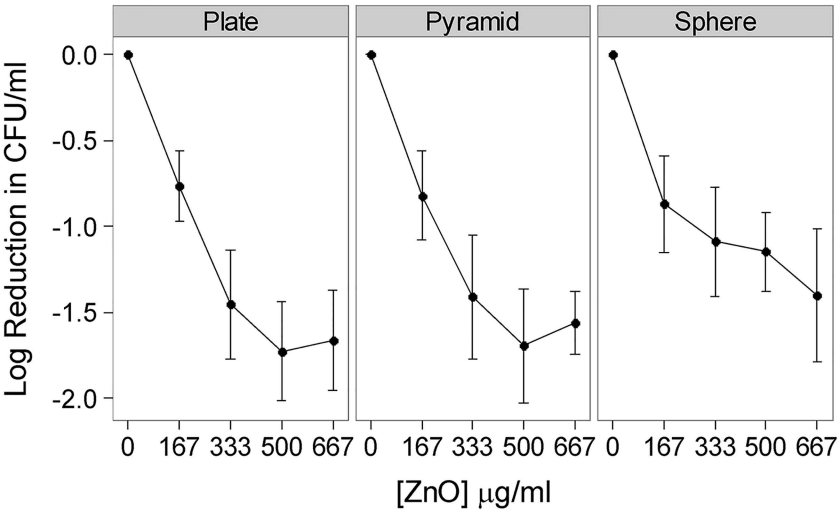

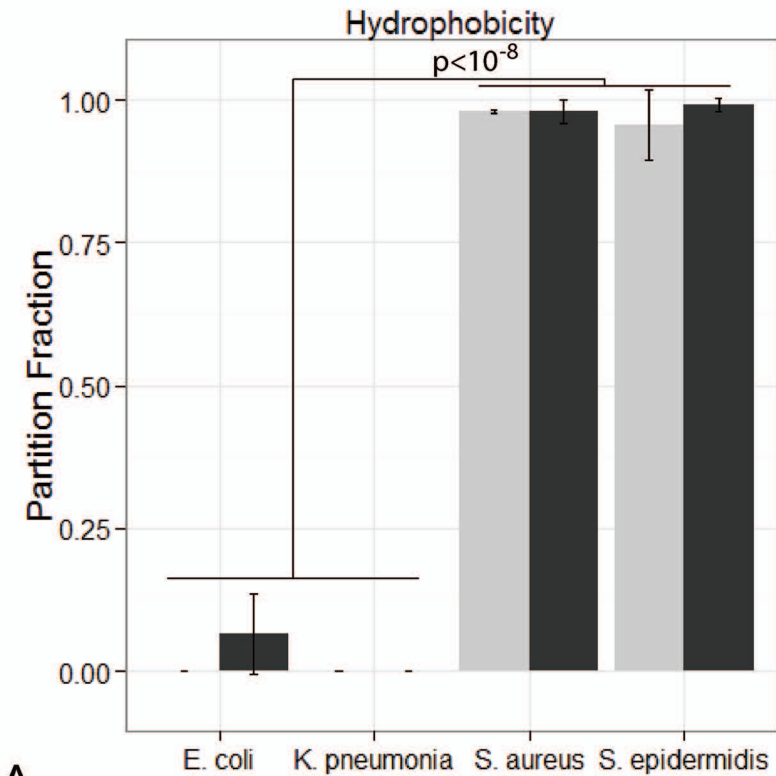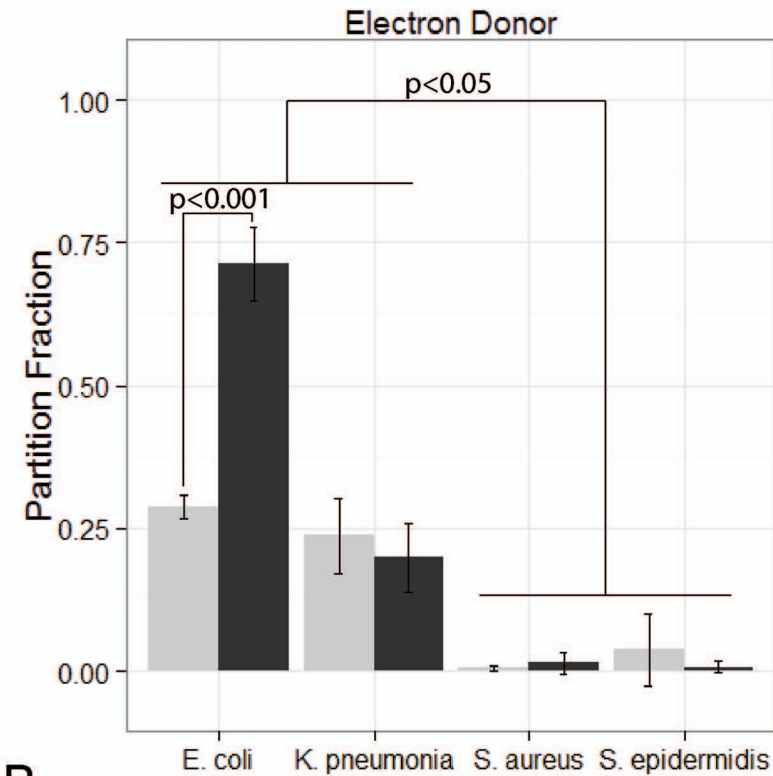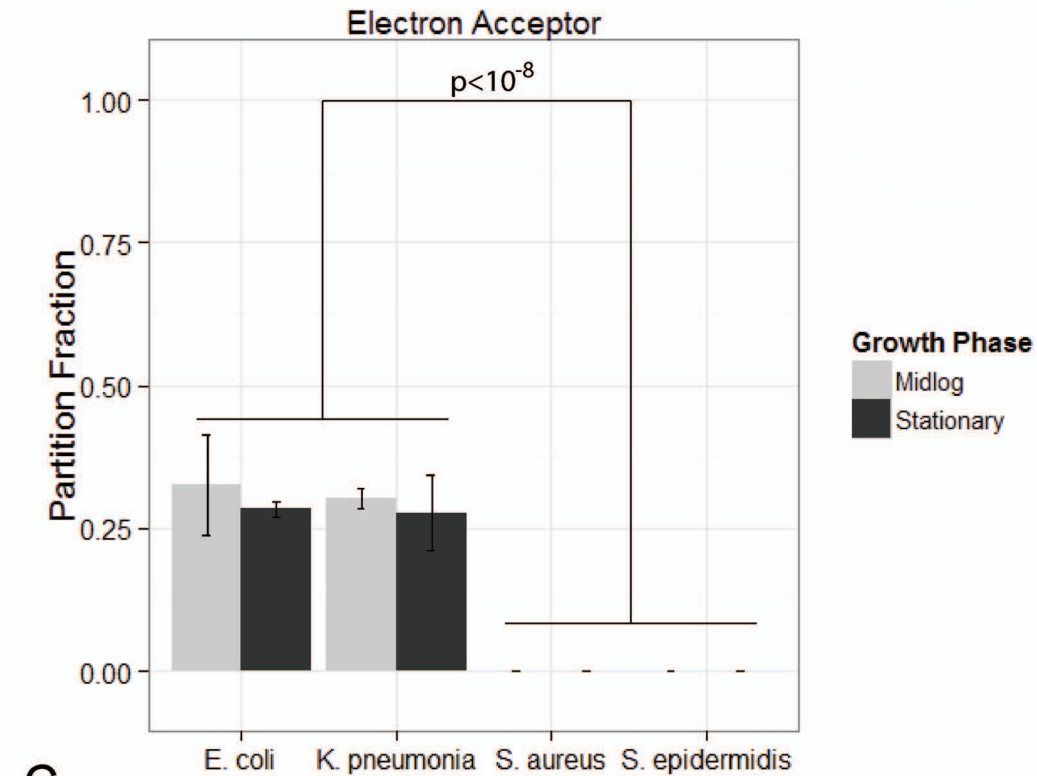

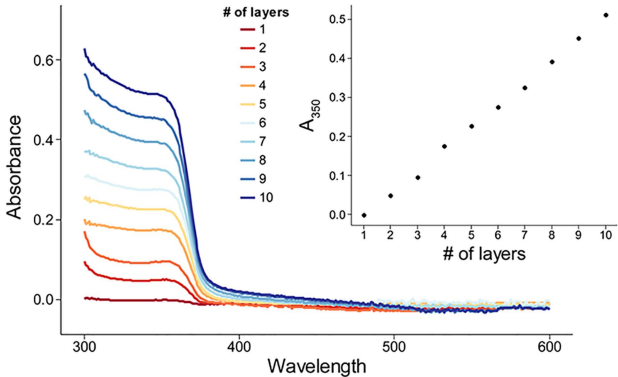

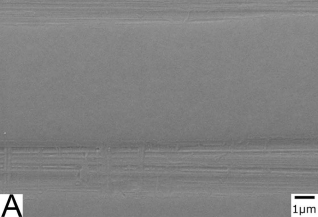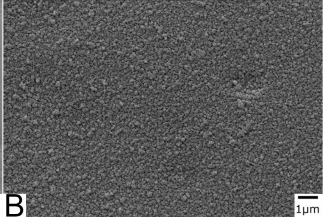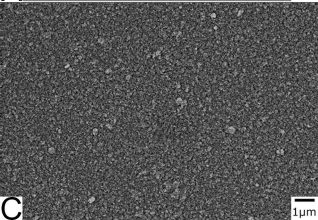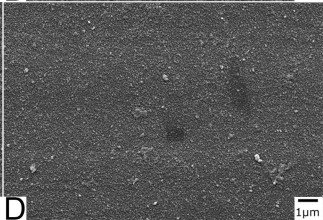



A

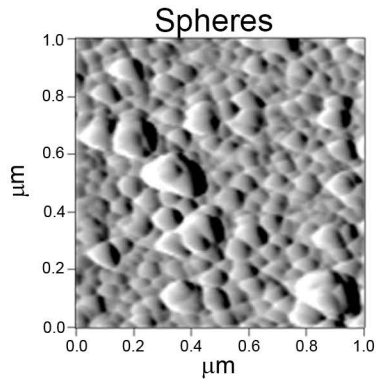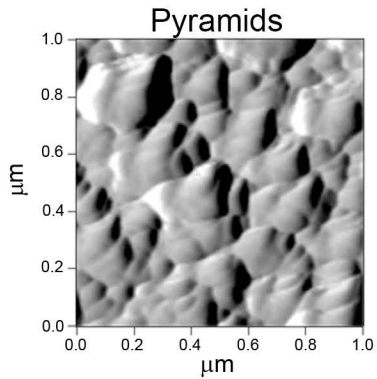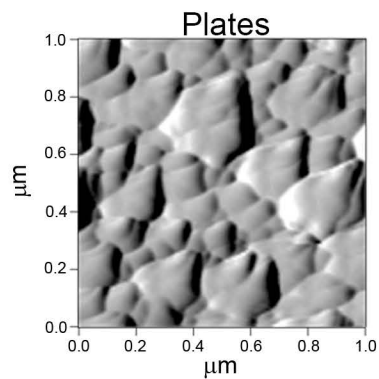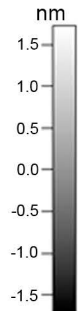

B

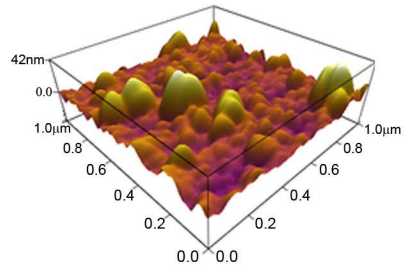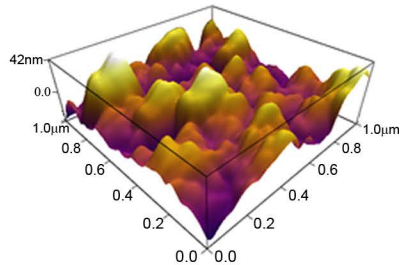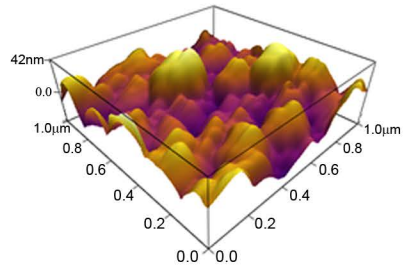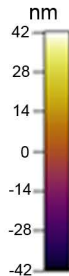

**Table S1.** ZnO-NP synthesis parameters

|                                                       | <b>Plates</b>       | <b>Pyramids</b>     | <b>Spheres</b>        |
|-------------------------------------------------------|---------------------|---------------------|-----------------------|
| final [KOH] (mM)                                      | 162                 | 35                  | 162                   |
| final [ZnAcetate] (mM)                                | 228                 | 250                 | 228                   |
| solvent                                               | 90% v/v<br>methanol | 90% v/v<br>methanol | Anhydrous<br>methanol |
| reflux time (hrs)                                     | 14                  | 48                  | 14                    |
| pH of final NP aqueous suspension                     | 7.5                 | 7.06                | 7.23                  |
| zeta potential of final NP aqueous<br>suspension (mV) | 44.1                | 37.2                | 34.4                  |

**Table S2.** Idealized geometry formulas

| shape   | volume (V)                | surface area (S <sub>A</sub> )                           |
|---------|---------------------------|----------------------------------------------------------|
| sphere  | $\frac{4}{3}\pi r^3$      | $4\pi r^2$                                               |
| plate   | $\pi r^2 h$               | $2\pi hr + 2\pi r^2$                                     |
| pyramid | $\frac{\sqrt{3}}{2}a^2 h$ | $\frac{3\sqrt{3}}{2}a^2 + 3a\sqrt{h^2 + \frac{3a^2}{4}}$ |

**Table S3.** Root mean square (RMS) roughness and water contact angle for LBL coatings

| <b>Sample</b> | <b>RMS roughness<br/>(nm)</b> | <b>Water contact<br/>angle</b> |
|---------------|-------------------------------|--------------------------------|
| glass         | 0.3                           |                                |
| plate         | 16.7                          | 18°                            |
| pyramid       | 12.7                          | 56°                            |
| sphere        | 12.8                          | 26°                            |

**Table S4.** Zeta potential for bacterial strains (mean  $\pm$  standard deviation)

|                       | <b>Zeta potential<br/>(mV)</b> |
|-----------------------|--------------------------------|
| <i>E. coli</i>        | -46.6 $\pm$ 1.3                |
| <i>K. pneumoniae</i>  | -22.8 $\pm$ 0.7                |
| <i>S. aureus</i>      | -25.6 $\pm$ 0.8                |
| <i>S. epidermidis</i> | -26.0 $\pm$ 2.5                |
